# Supplementary material for: Desorption Lifetimes and Activation Energies Influencing Gas-Surface Interactions and Multiphase Chemical Kinetics
Source: Copernicus journal article supplement (doi:10.5194/egusphere-2023-2314), 2023-10-13
Supplement: Supplementary file 1 [file egusphere-2023-2314-supplement.pdf]

1 **Desorption Lifetimes and Activation Energies Influencing Gas-Surface Interactions and**  
2 **Multiphase Chemical Kinetics**

3

4 *Daniel A. Knopf<sup>1,2,\*</sup>, Markus Ammann<sup>3</sup>, Thomas Berkemeier<sup>4</sup>, Ulrich Pöschl<sup>4</sup>, Manabu Shiraiwa<sup>5,\*</sup>*

5 1. School of Marine and Atmospheric Sciences, Stony Brook University, Stony Brook, New  
6 York, USA.

7 2. Department of Chemistry, Stony Brook University, Stony Brook, New York, USA.

8 3. Laboratory of Environmental Chemistry, Paul Scherrer Institute, Villigen, Switzerland

9 4. Multiphase Chemistry Department, Max Planck Institute for Chemistry, Mainz, Germany

10 5. Department of Chemistry, University of California Irvine, California, USA

11 *Correspondence to:* \*daniel.knopf@stonybrook.edu; m.shiraiwa@uci.edu

12 This Supplement comprises of seven figures (S1-S7).

13

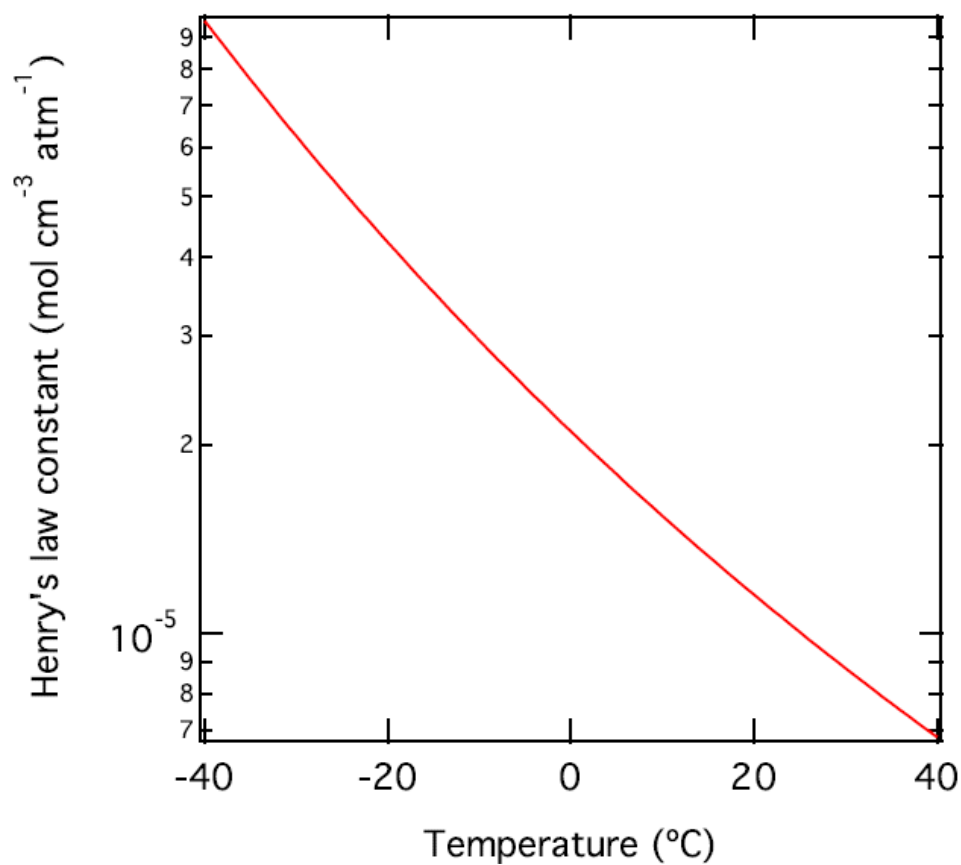

14

15 **Figure S1.** The temperature dependence of the Henry's law coefficient is shown using the van't  
16 Hoff equation with solvation enthalpy of 20 kJ mol<sup>-1</sup>.

17

18

19

20

21

22

23

24

25

26

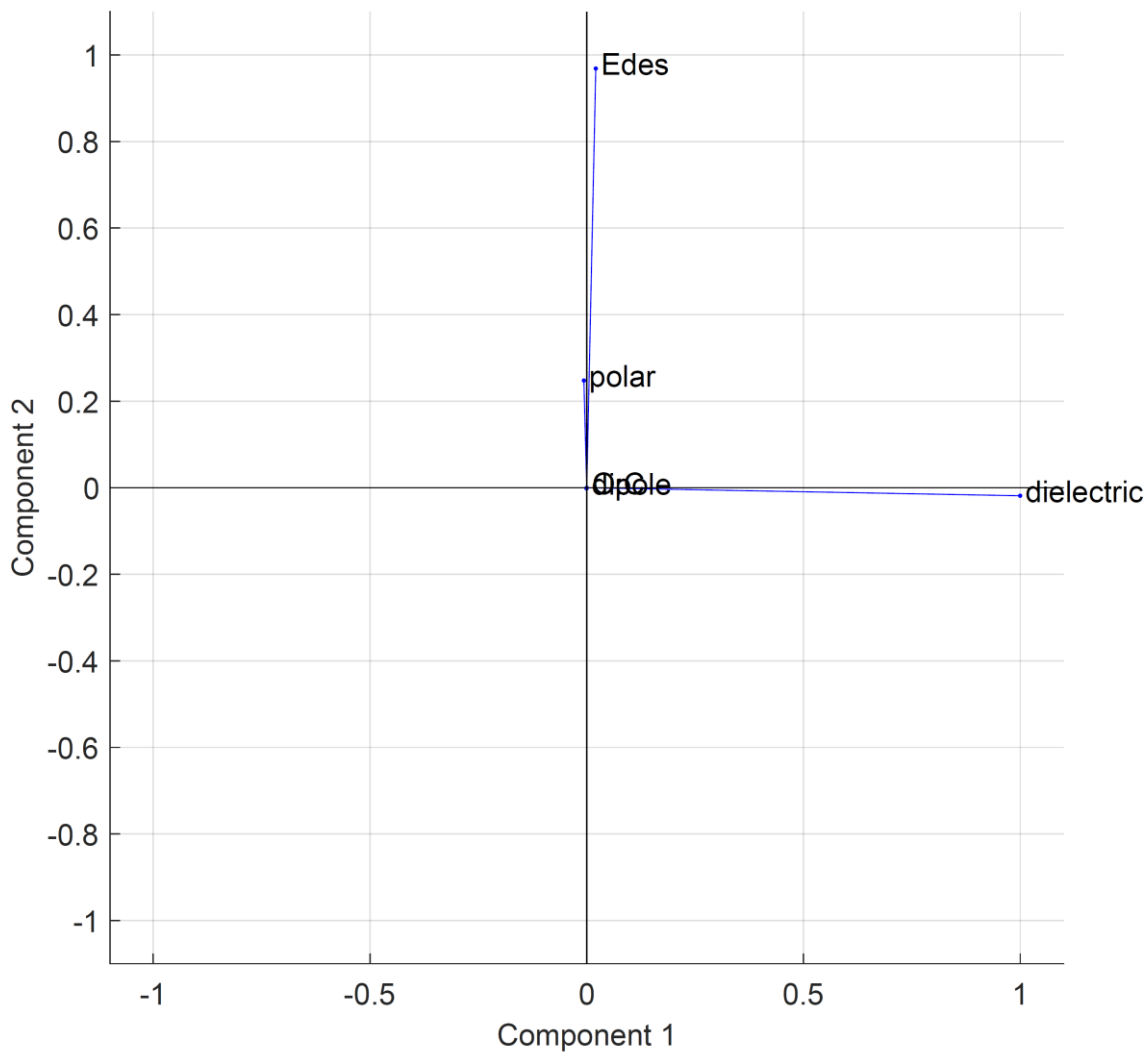

27

28 **Figure S2.** Coefficients derived from principal component analysis to examine the dependencies  
 29 between the desorption energy ( $E_{des}^0$ ), polarizability (polar,  $\alpha$ ), dipole moment (dipole,  $\mu$ ),  
 30 oxygen to carbon ratio ( $O:C$ ), and relative permittivity of the substrates (dielectric,  $\epsilon_r$ ).

31

32

33

34

35

36

37

38

39

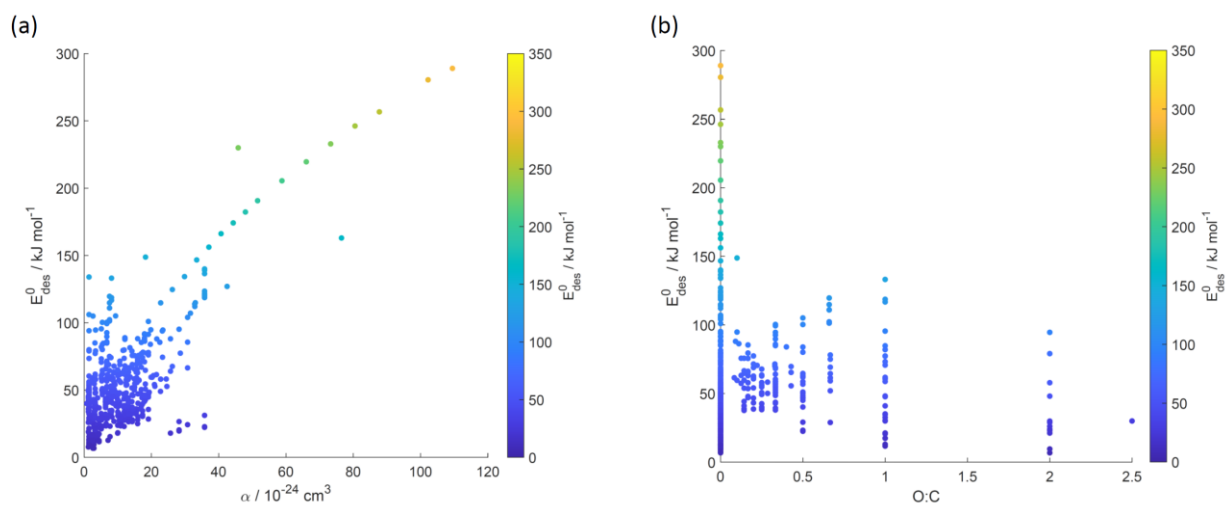

40

41 **Figure S3.** Desorption energy ( $E_{\text{des}}^0$ ) as a function of gas species polarizability ( $\alpha$ ) in panel (a)  
42 and as a function of oxidation state of gas species expressed as  $O:C$  (b) using data from Tables  
43 A1-A15. Panels (a) and (b) reflect data from Fig. 8.

44

45

46

47

48

49

50

51

52

53

54

55

56

57

58

59

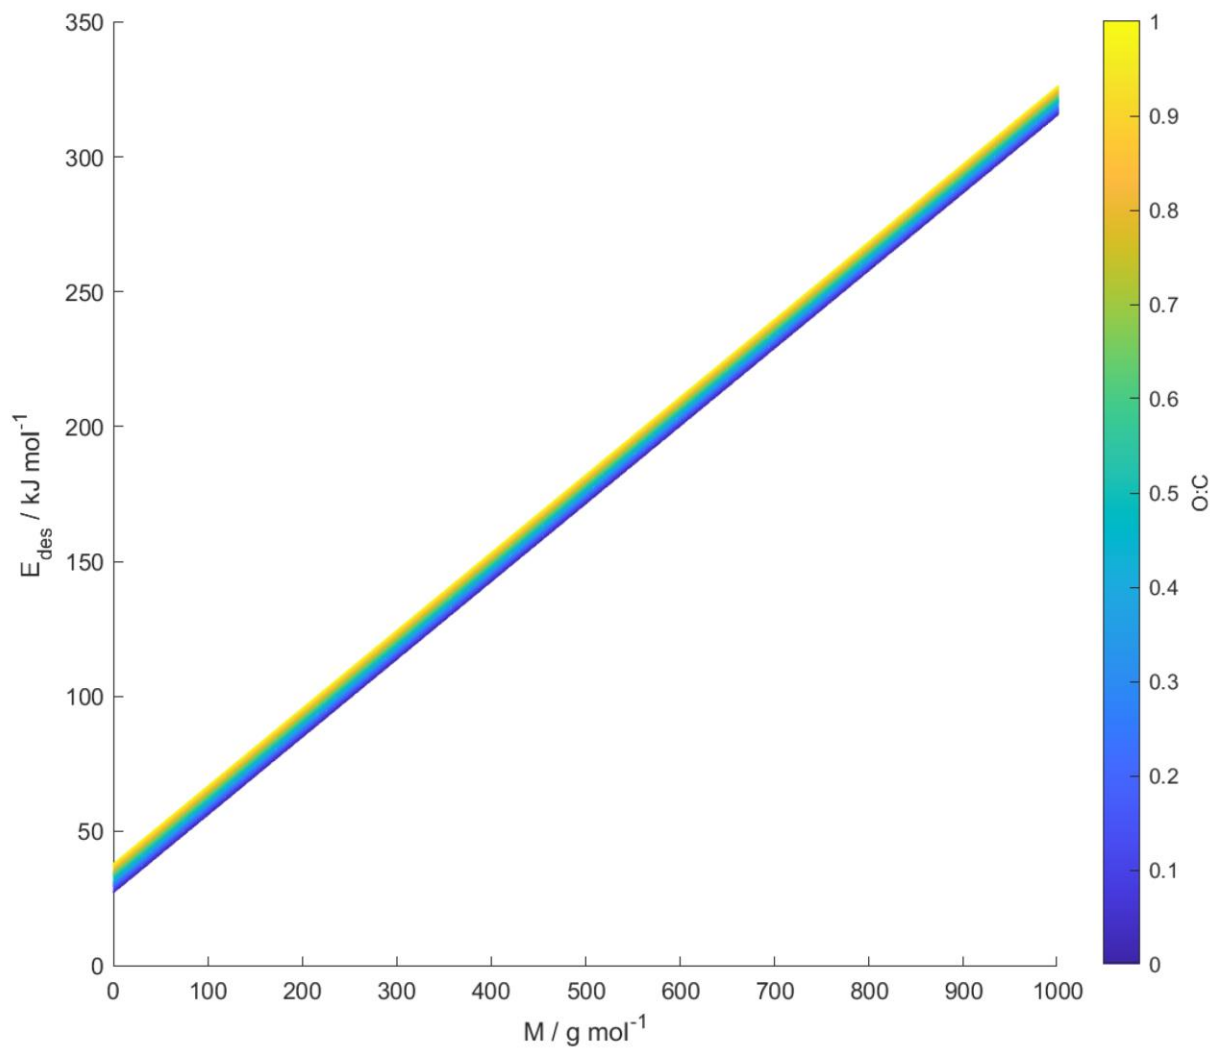

60

61 **Figure S4.**  $E_{\text{des}}^0$  values derived from the new parameterization (Eq. (16)) applying arbitrary  
62 values of molar mass ( $M$ ) and  $O:C$ , the latter coded as symbol color described by the color bar.

63

64

65

66

67

68

69

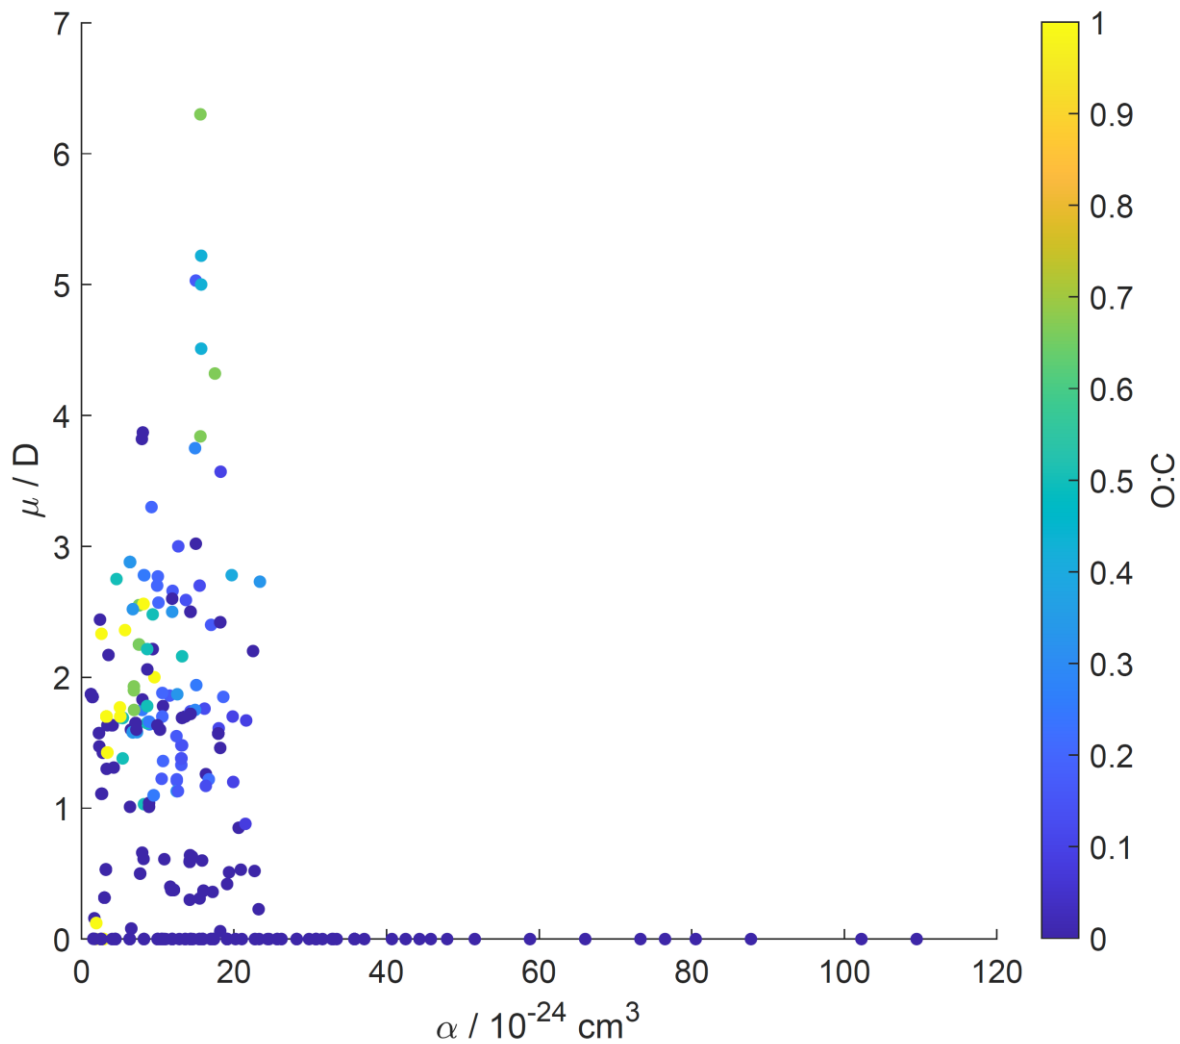

70

71 **Figure S5.** The dipole moment ( $\mu$ ) is plotted against the polarizability ( $\alpha$ ) where color shading  
72 indicates the oxidation state ( $O:C$ ). Note that three gas species with  $O:C > 1$  ( $\text{CO}_2$  and formic  
73 acid) are included in this plot as having  $O:C = 1$  to allow for better visualization of entire data  
74 set.

75

76

77

78

79

80

81

82

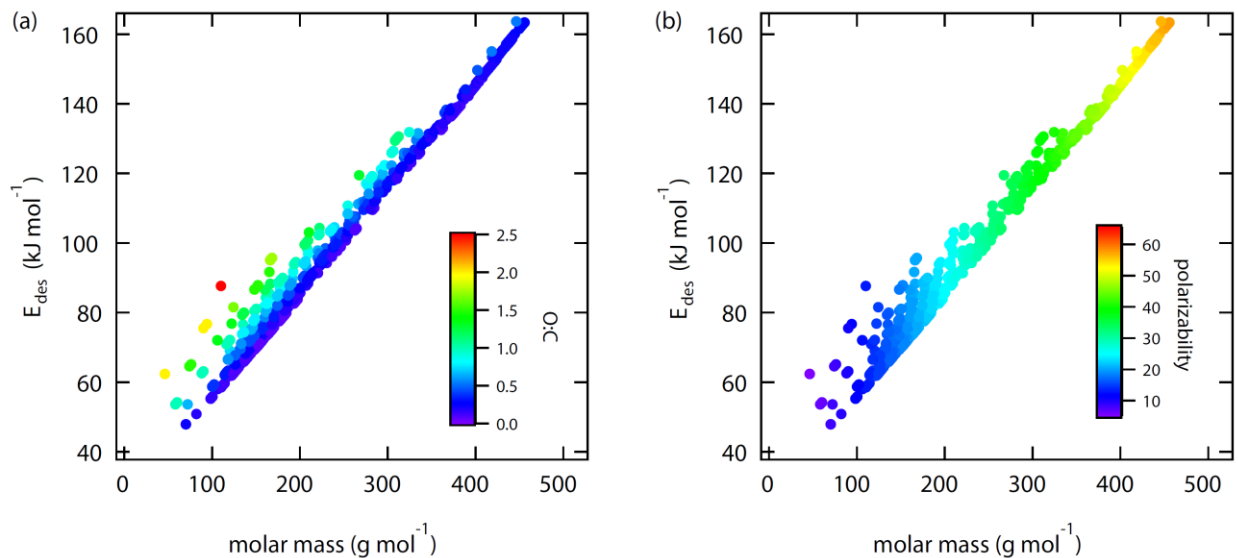

83  
 84 **Figure S6.** Calculated desorption energies ( $E_{\text{des}}^0$ ) of SOA precursor gases from (Shiraiwa et al.,  
 85 2014) as a function molar mass and its dependence on  $O:C$  (a) and polarizability (b) using  
 86 parameterization Eq. (16).

87  
 88  
 89  
 90  
 91  
 92  
 93  
 94  
 95  
 96  
 97  
 98  
 99  
 100  
 101  
 102  
 103

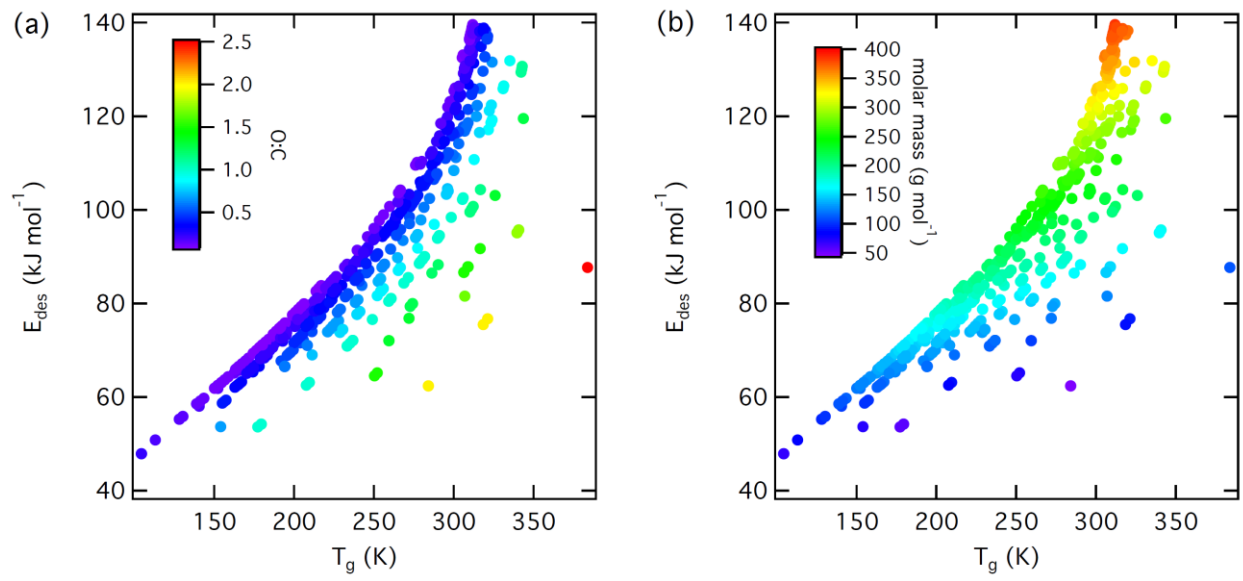

104

105 **Figure S7.** Relationship between calculated desorption energies ( $E_{\text{des}}^0$ ) of SOA precursor gases  
 106 from (Shiraiwa et al., 2014) and species' glass transition temperature ( $T_g$ ) and its dependence on  
 107 O: C (a) and molar mass (b) using parameterization Eq. (16).

108

109

110

111

112

113

114

115

116

117

118

119

120

121

122

123



124 **References**

125 Shiraiwa, M., Berkemeier, T., Schilling-Fahnestock, K. A., Seinfeld, J. H., and Pöschl, U.:  
126 Molecular corridors and kinetic regimes in the multiphase chemical evolution of secondary  
127 organic aerosol, *Atmos. Chem. Phys.*, 14, 8323-8341, 10.5194/acp-14-8323-2014, 2014.

128
